# Supplementary material
Source: HighWire-hosted journal article supplement (http://www.qdcxjkg.com/highwire/filestream/113491/field_highwire_adjunct_files/0/CME391january.pdf)
Supplement: CME391january.pdf [file CME391january.pdf]

# CME Credit Application Form

## (1 CME credit)

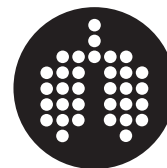

To receive CME credits, read the CME article in this issue, indicate the correct responses to the educational questions and complete the requested information. This form is also available in electronic format at [www.erj.ersjournals.com/current.dtl](http://www.erj.ersjournals.com/current.dtl). To return your application, you can either:

- use this form and return it completed to ERS Publications Office, 442 Glossop Road, Sheffield, S10 2PX, UK; fax to +44-114-2665064; or e-mail to [info@ersj.org.uk](mailto:info@ersj.org.uk)
- fill in the online form at [www.erj.ersjournals.com/current.dtl](http://www.erj.ersjournals.com/current.dtl)

Certificates will be e-mailed to the address filled in below. Please allow 4 weeks for processing.

**CME credit applications are now free of charge.**

### Applicant personal details.

ERS Membership No. (if known): ..... Date of Birth (DD/MM/YYYY): .....

Family Name: ..... First Name: .....

Mailing Address: .....

.....

Postal Code: ..... City: ..... Country: .....

Telephone: + ..... E-mail: .....

### Educational questions.

**"Unrecognised ventricular dysfunction in chronic obstructive pulmonary disease"**

**1. Regarding the presence of airflow obstruction in patients with established diagnosis of chronic heart failure, which of the following statements is true.**

- It has a low prevalence and is an indicator of poor survival.  It has a low prevalence and has no relationship with mortality.
- It has a high prevalence and is an indicator of poor survival.  It has a high prevalence and has no relationship with mortality.

**2. Which of the following statements is incorrect for patients with COPD?**

- A routine assessment of left ventricular function is important because the presence of left ventricular dysfunction is associated with a poor prognosis.  Most patients with ventricular dysfunction have systolic dysfunction.  The presence of previous coronary heart disease is associated with a high probability of finding left ventricular dysfunction.  Assessment of BNP had no value as prognostic indicator of left ventricular dysfunction.

**3. Which of the following statements is true?**

- There is a danger of over-diagnosing COPD in older adults because GOLD criteria do not adequately adjust for age.  Most studies reporting the prevalence of COPD in patients with CHF reported prevalences ranging from 50% to 75%.  Some reports have emphasised that short-acting  $\beta_2$  agonists and ipratropium bromide decreased risk of sudden death in patients with COPD.  The adjusted probability of death in patients with COPD and ventricular dysfunction was more than 5-fold the risk of patients without ventricular dysfunction.

**4. Which of the following statement is not true regarding the role of BNP assessment in patients with COPD?**

- The assessment of NT-pro BNP is useful for the detection of ventricular dysfunction in patients with COPD.  A cut-off point of  $160 \text{ pg} \cdot \text{mL}^{-1}$  increased the probability of finding ventricular dysfunction more than 10-fold.  NT-pro BNP is used only for experimental purposes and is not part of clinical practice.
